# Supplementary material for: Association between polymorphisms in sex hormones synthesis and metabolism and prostate cancer aggressiveness
Source: PLoS One. 2017 Oct 5;12(10):e0185447. doi: 10.1371/journal.pone.0185447 (PMC5628818; doi:10.1371/journal.pone.0185447)
Supplement: S4 Table — All genotypes with a frequency less than 5% in the population have been omitted. (XLSX) [file pone.0185447.s005.xlsx]

## Sheet: Hoja1
	S4 Table. Multigene analysis
	PSA
	rs743572	rs2293275	rs6152	rs1062577	rs6162	rs6163	rs1256049	rs1004467	Frequency	Difference (95%CI)	p-value
	G	T	G	T	A	A	C	A	0.0851	0.68 (0.35-1.31)	0.0011
	G	T	G	-	-	A	C	A	0.088	0.87 (0.41 - 1.32)	0.00025
	G	T	G	-	A	A	-	A	0.0871	0.87 (0.41 - 1.34)	0.00026
	G	T	G	-	A	A	C	A	0.0876	0.86 (0.39 - 1.32)	0.00037
	-	T	G	-	A	A	C	A	0.0885	0.85 (0.39 - 1.31)	0.00038
	-	-	-	T	A	A	C	G	0.0624	- 0.5 (-0.96 - - 0.05)	0.031
	G	-	-	T	A	-	C	G	0.0634	- 0.5 (-0.96 - - 0.04)	0.033
	G	-	-	T	A	A	C	G	0.0631	- 0.5 (-0.96 - - 0.03)	0.036
	-	-	-	T	A	A	-	G	0.0788	- 0.43 (-0.79 - -0.08)	0.016
	Gleason
	rs743572	rs2293275	rs6152	rs1062577	rs6162	rs6163	rs1256049	rs1004467	Frequency	Difference (95%CI)	p-value
	G	T	G	T	A	A	C	A	0.0781	5.21 ( 1.23 - 22.02)	0.026
	G	T	G	-	A	A	C	A	0.0845	6.15 (5.47 - 6.91)	<0.0001
	G	T	G	-	A	-	C	A	0.0844	6.47 (6.15 - 6.80)	< 0.0001
	G	T	G	A	-	C	C	A	0.0857	6.44 (1.66 - 25.04)	0.008
	G	T	-	-	A	A	C	A	0.0979	5.11 (1.53 - 17.09)	0.009
	A	T	G	-	G	C	C	A	0.1535	- 0.38 (-0.37 - - 0.40)	<0.0001
	A	T	G	-	G	-	C	A	0.1566	- 0.38 (-0.37 - - 0.39)	<0.0001
	A	C	A	-	G	-	C	A	0.0656	- 0.86 (-0.83 - - 0.88)	<0.0001
	TNM
	rs743572	rs2293275	rs6152	rs1062577	rs6162	rs6163	rs1256049	rs1004467	Frequency	Difference (95%CI)	p-value
	G	C	G	T	A	A	C	A	0.1158	6.34 (1.06 - 37.88)	0.045
	-	C	G	T	A	-	-	A	0.1173	6.29 (1.27 - 31.26)	0.026
	-	C	G	T	A	A	-	A	0.1045	6.81 (1.17 - 39.67)	0.035
	G	C	G	T	A	-	-	A	0.1144	6.63 (1.16 - 37.94)	0.036
	G	C	G	T	A	A	-	A	0.1126	6.64 (1.15 - 38.47)	0.037
	D´Amico Risk
	rs743572	rs2293275	rs6152	rs1062577	rs6162	rs6163	rs1256049	rs1004467	Frequency	Difference (95%CI)	p-value
	G	T	G	T	A	A	C	A	0.0862	0.6 (0.19 -1.02)	0.0045
	G	T	G	T	A	A	-	A	0.09	0.61 (0.22 -1.01)	0.0028
	G	T	G	-	A	A	C	A	0.089	0.6 (0.2 - 1)	0.0036
	G	T	G	-	A	A	C	-	0.1106	0.51 (0.17 - 0.86)	0.0041
	-	T	G	T	A	A	C	A	0.0957	0.59 (0.19 - 0.98)	0.0042
	G	T	G	T	-	A	C	A	0.0872	0.59 (0.19 - 0.99)	0.0044
